# Supplementary material
Source: publisher site journal article supplement (https://www.dovepress.com/get_supplementary_file.php?f=466312.docx)
Supplement: Supplementary file 1 [file get_supplementary_file.php]

***Supporting Information***


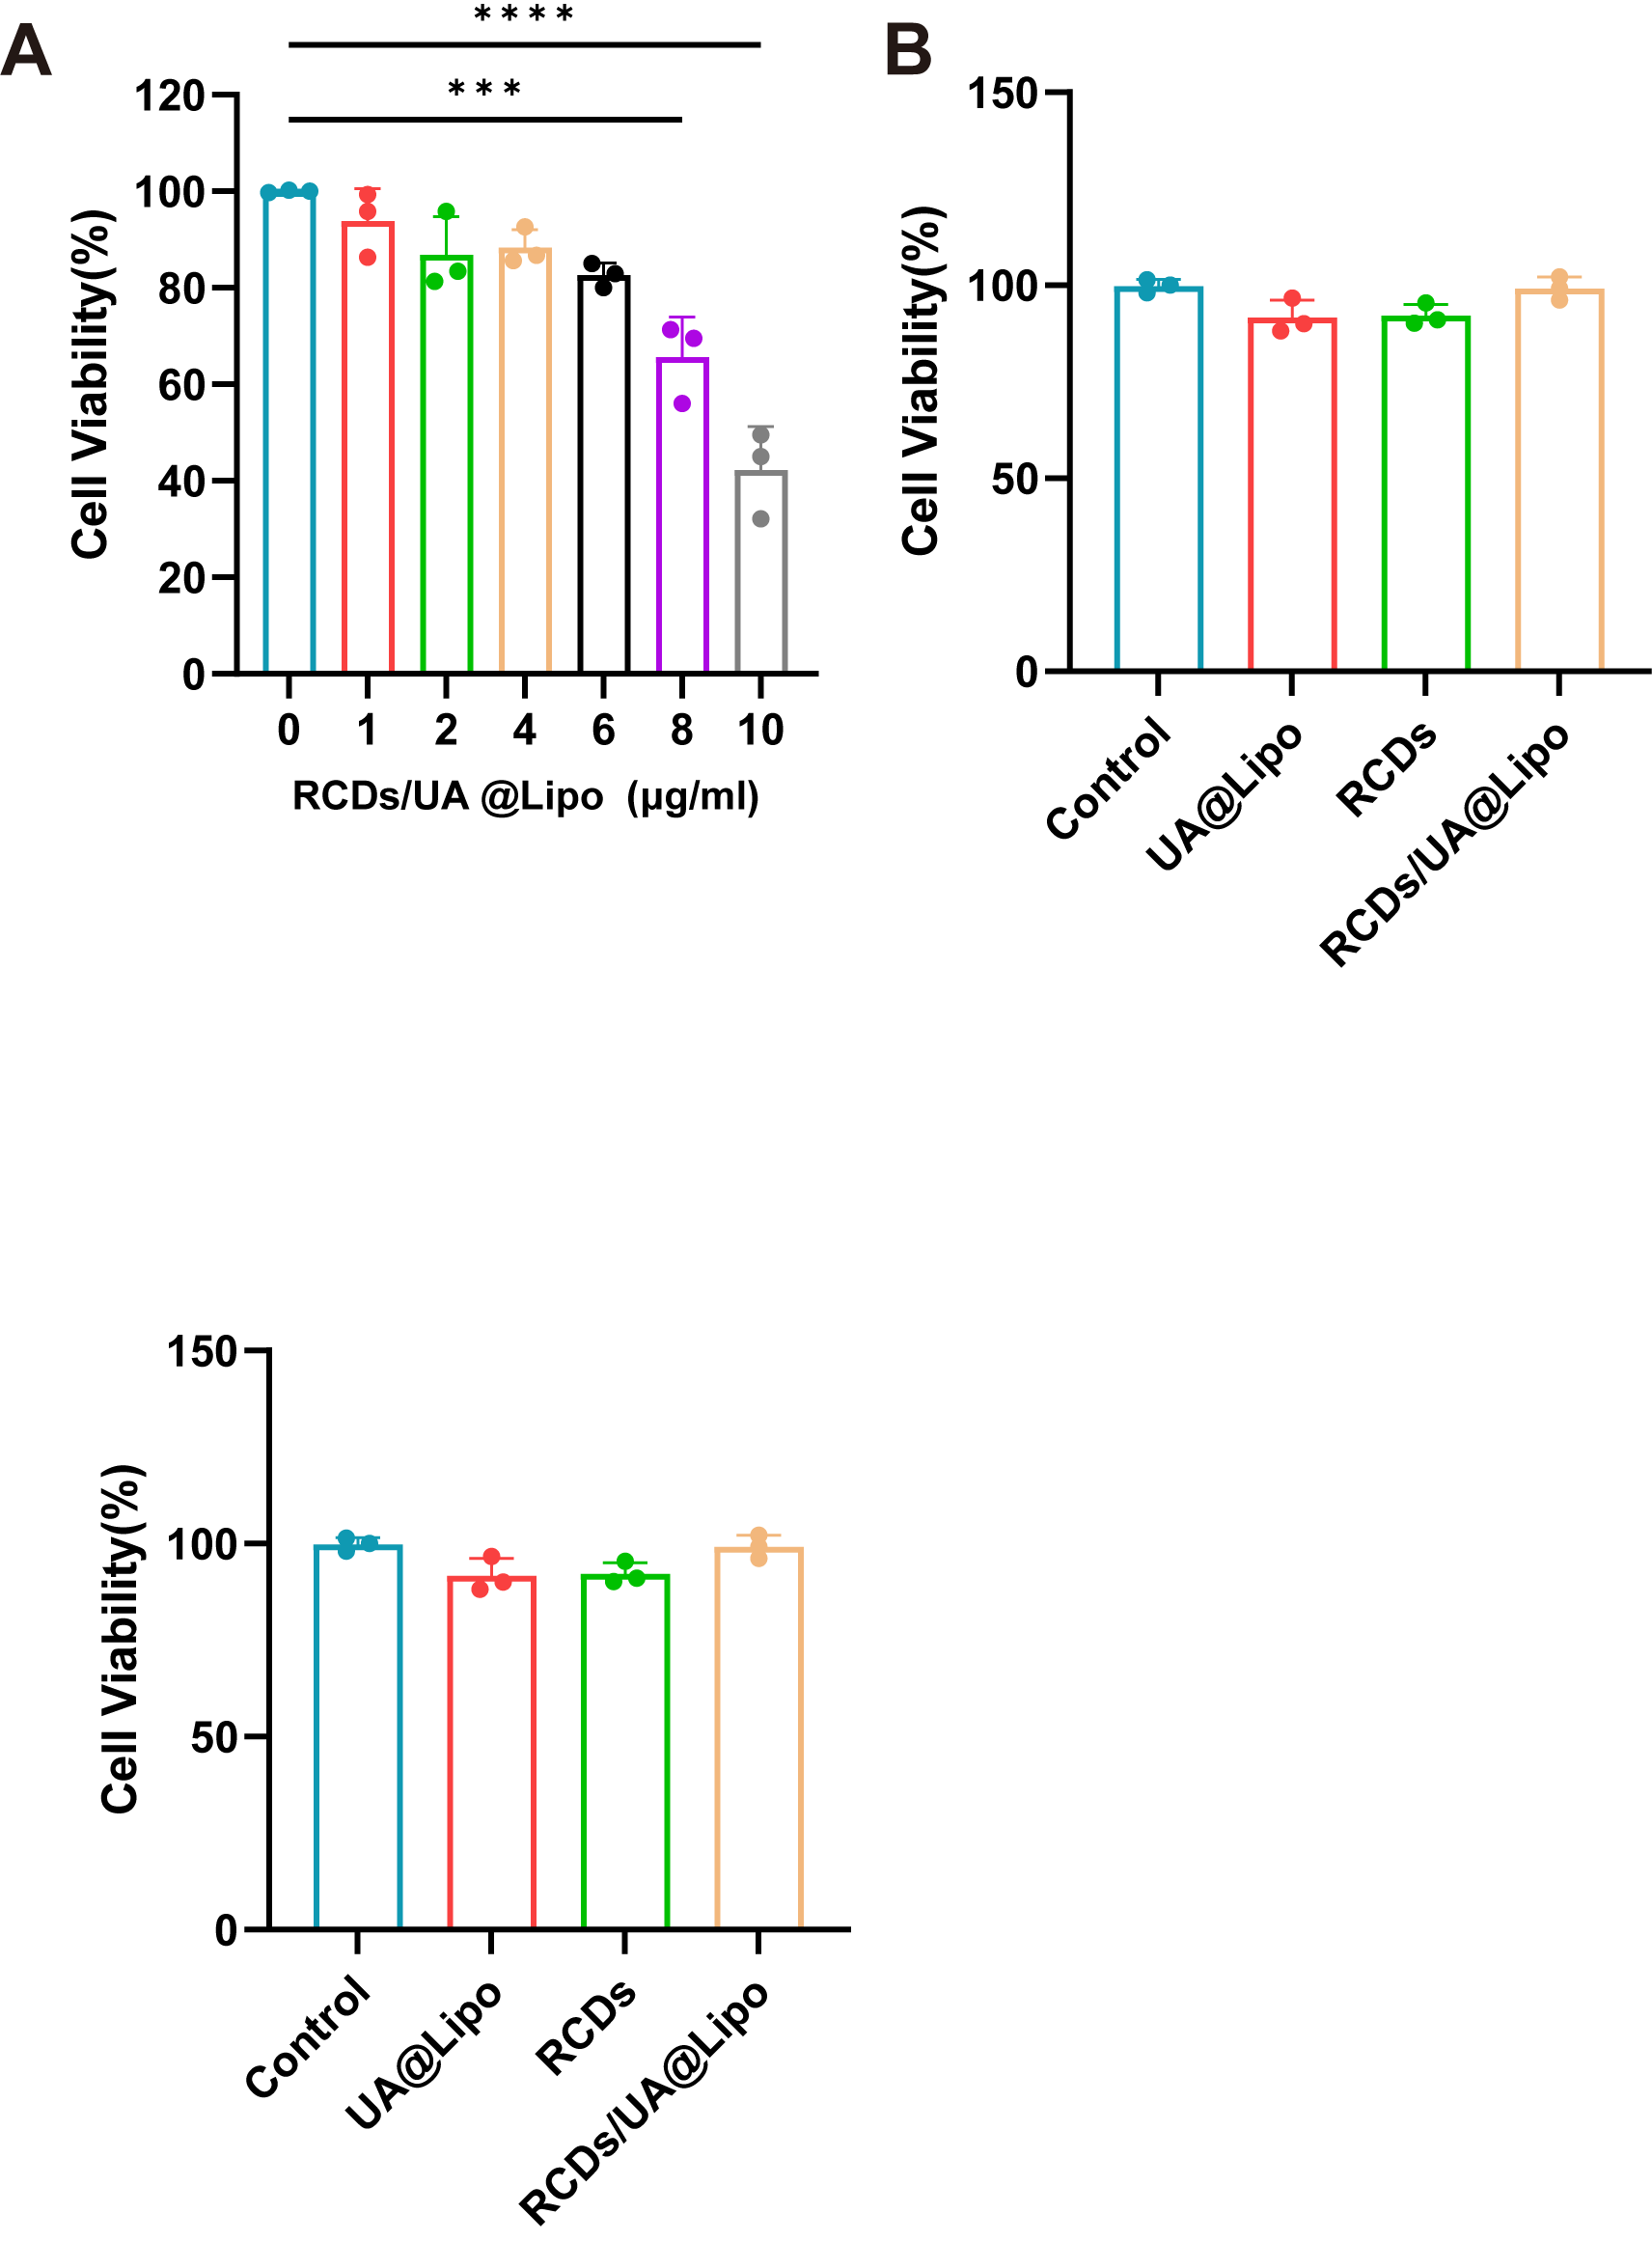


**Fig. S1** In vitro cytotoxicity of RCDs/UA@Lipo (0-10 μg/ml, the concentration of UA@Lipo and RCDs loaded in RCDs/UA@Lipo.) on NIH3T3 cells. Data are presented as mean ± SD. ***P<0.001，****P<0.0001.


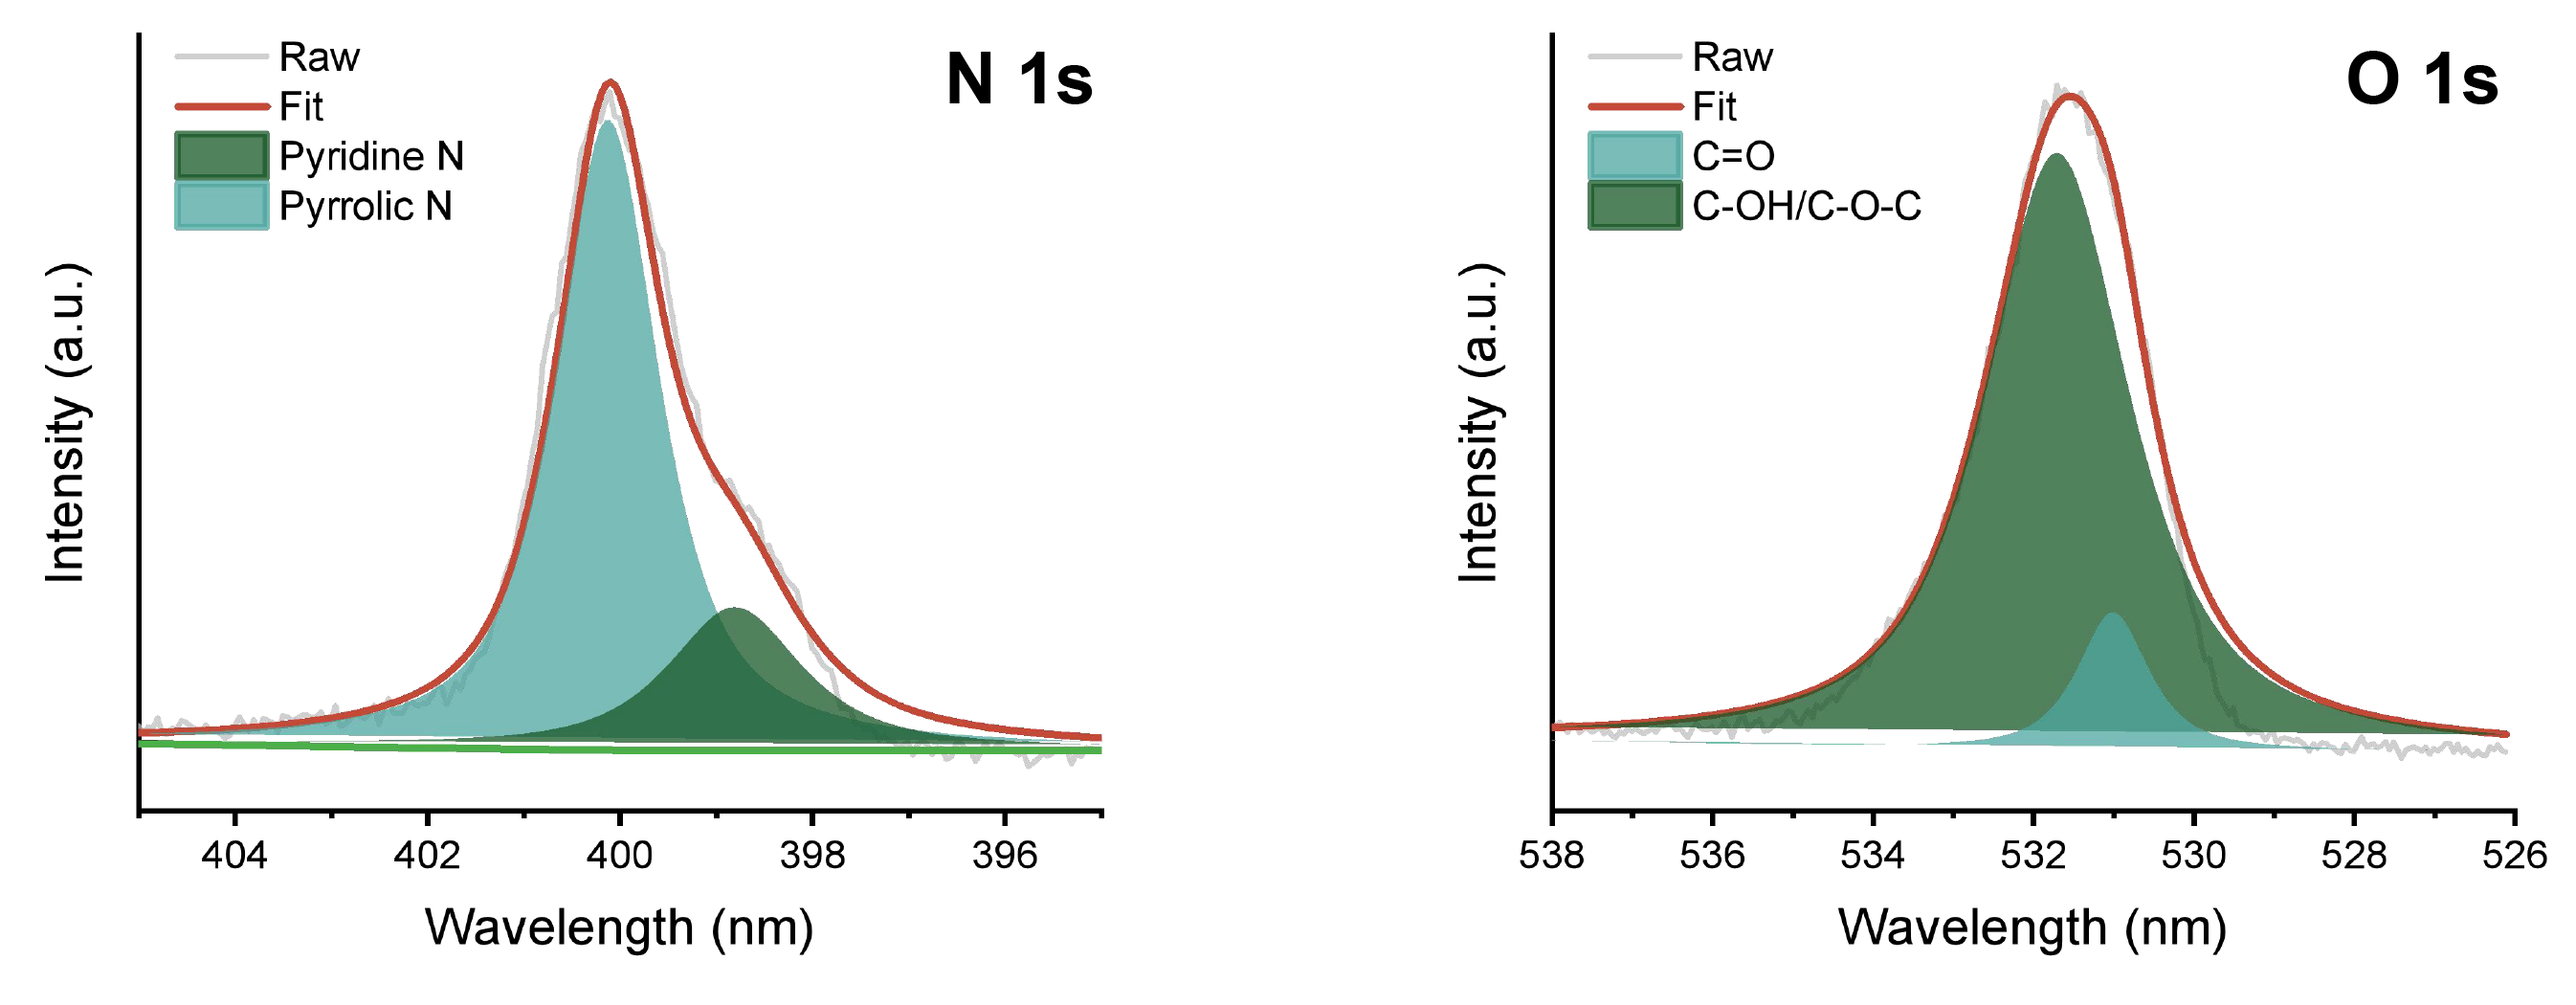


**Fig. S2** Deconvoluted N 1s and O 1s XPS spectra of RCDs.


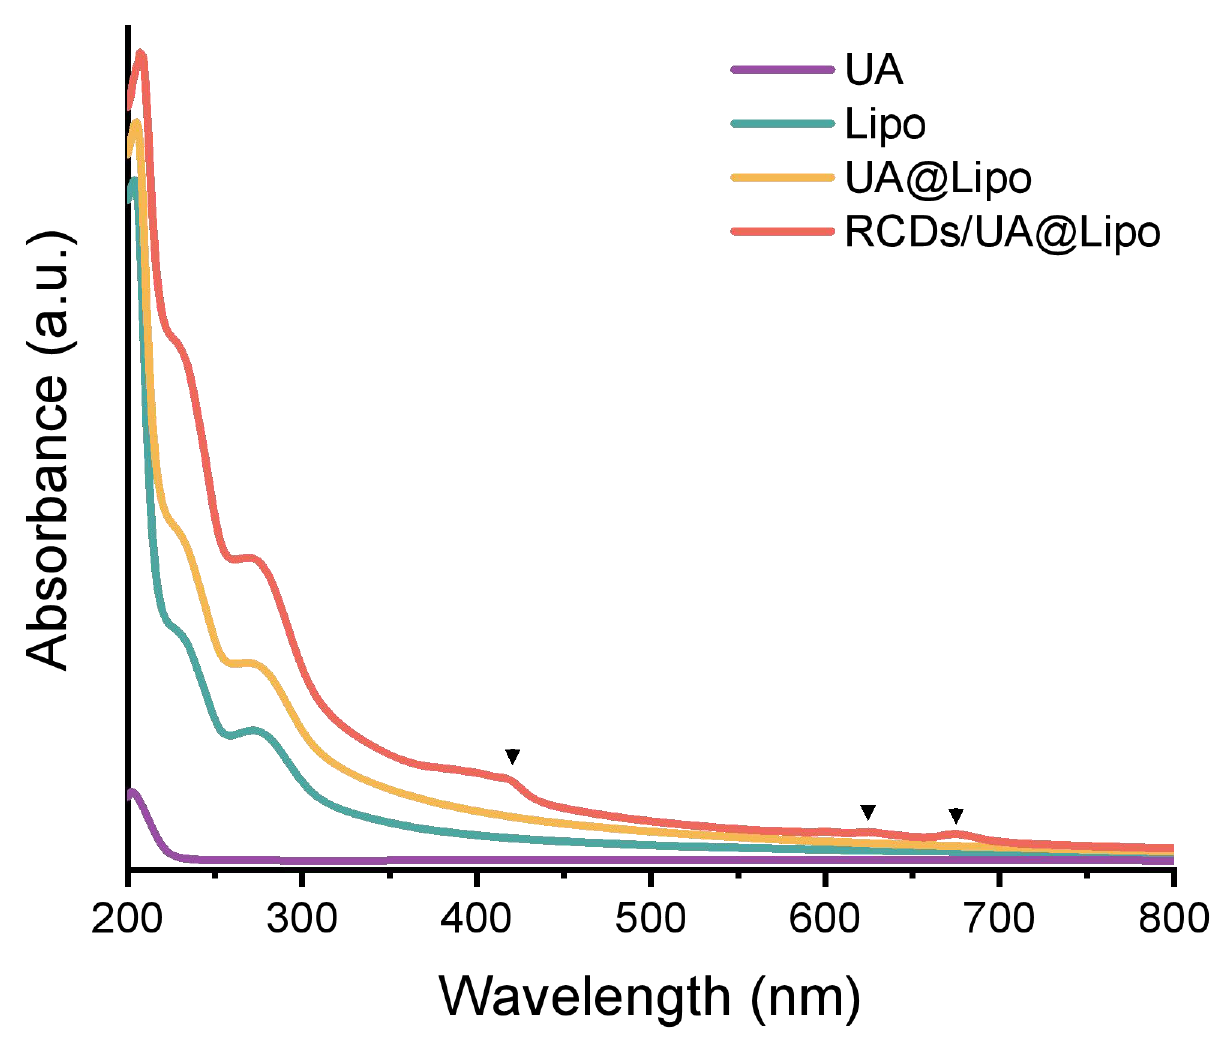


**Fig. S3** UV-Vis absorption spectra of UA, Lipo, UA@Lipo, and RCDs/UA@Lipo.


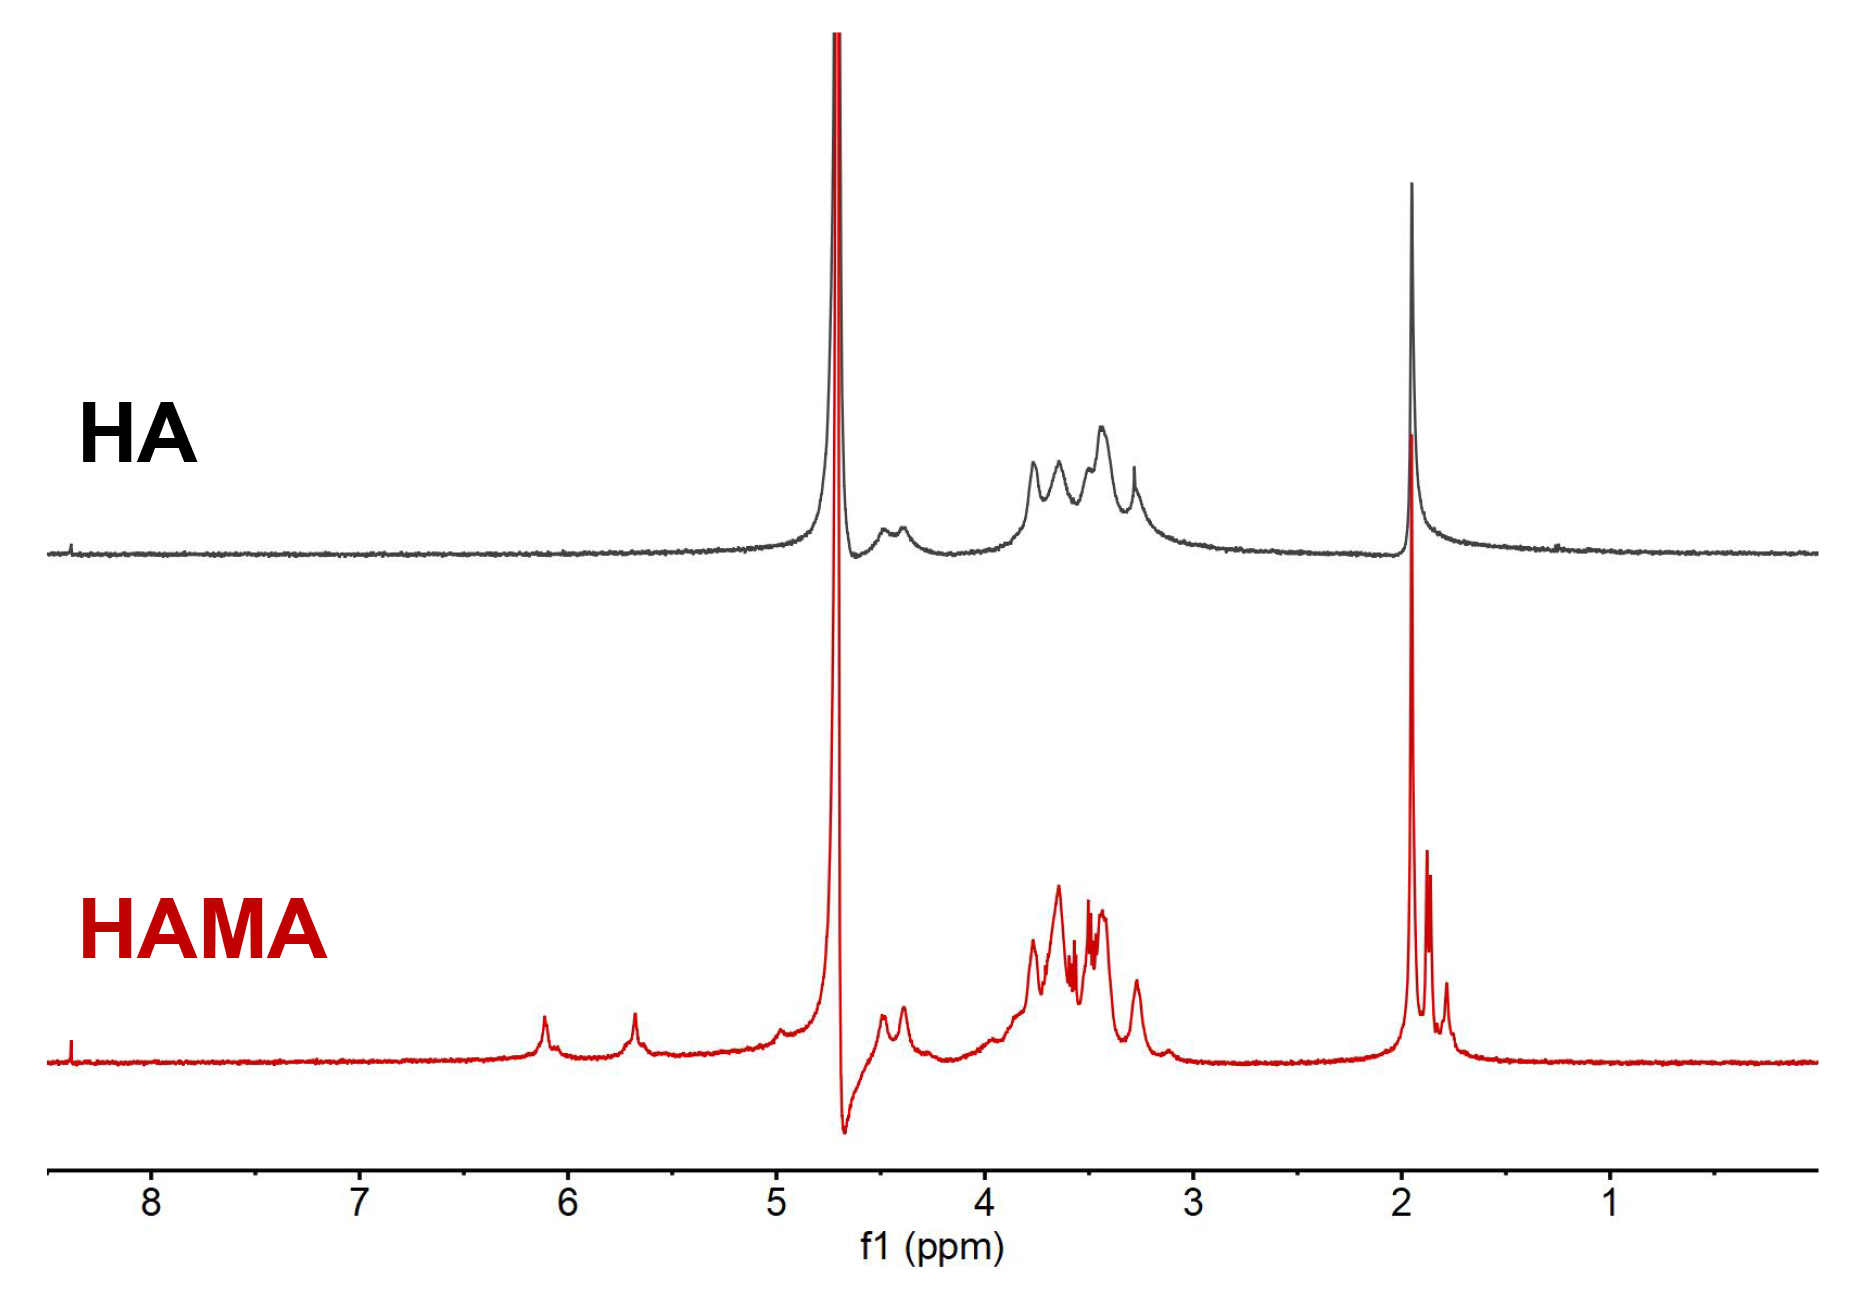


**Fig. S4** H-NMR spectra of HA and HAMA.


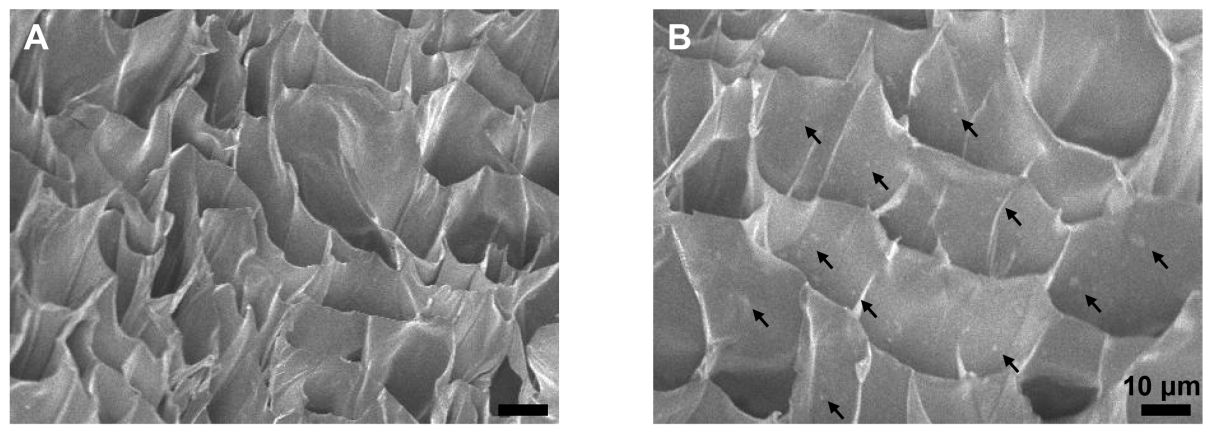


**Fig. S5** SEM images of internal structures of HAMA hydrogel(A) and RCDs/UA@Lipo-HAMA (B). Compared with HAMA, white spots appear on the porous mesh layer of RCDs/UA@Lipo-HAMA (indicated by the black arrows), which may suggest the presence of nanoparticles in the hydrogel.


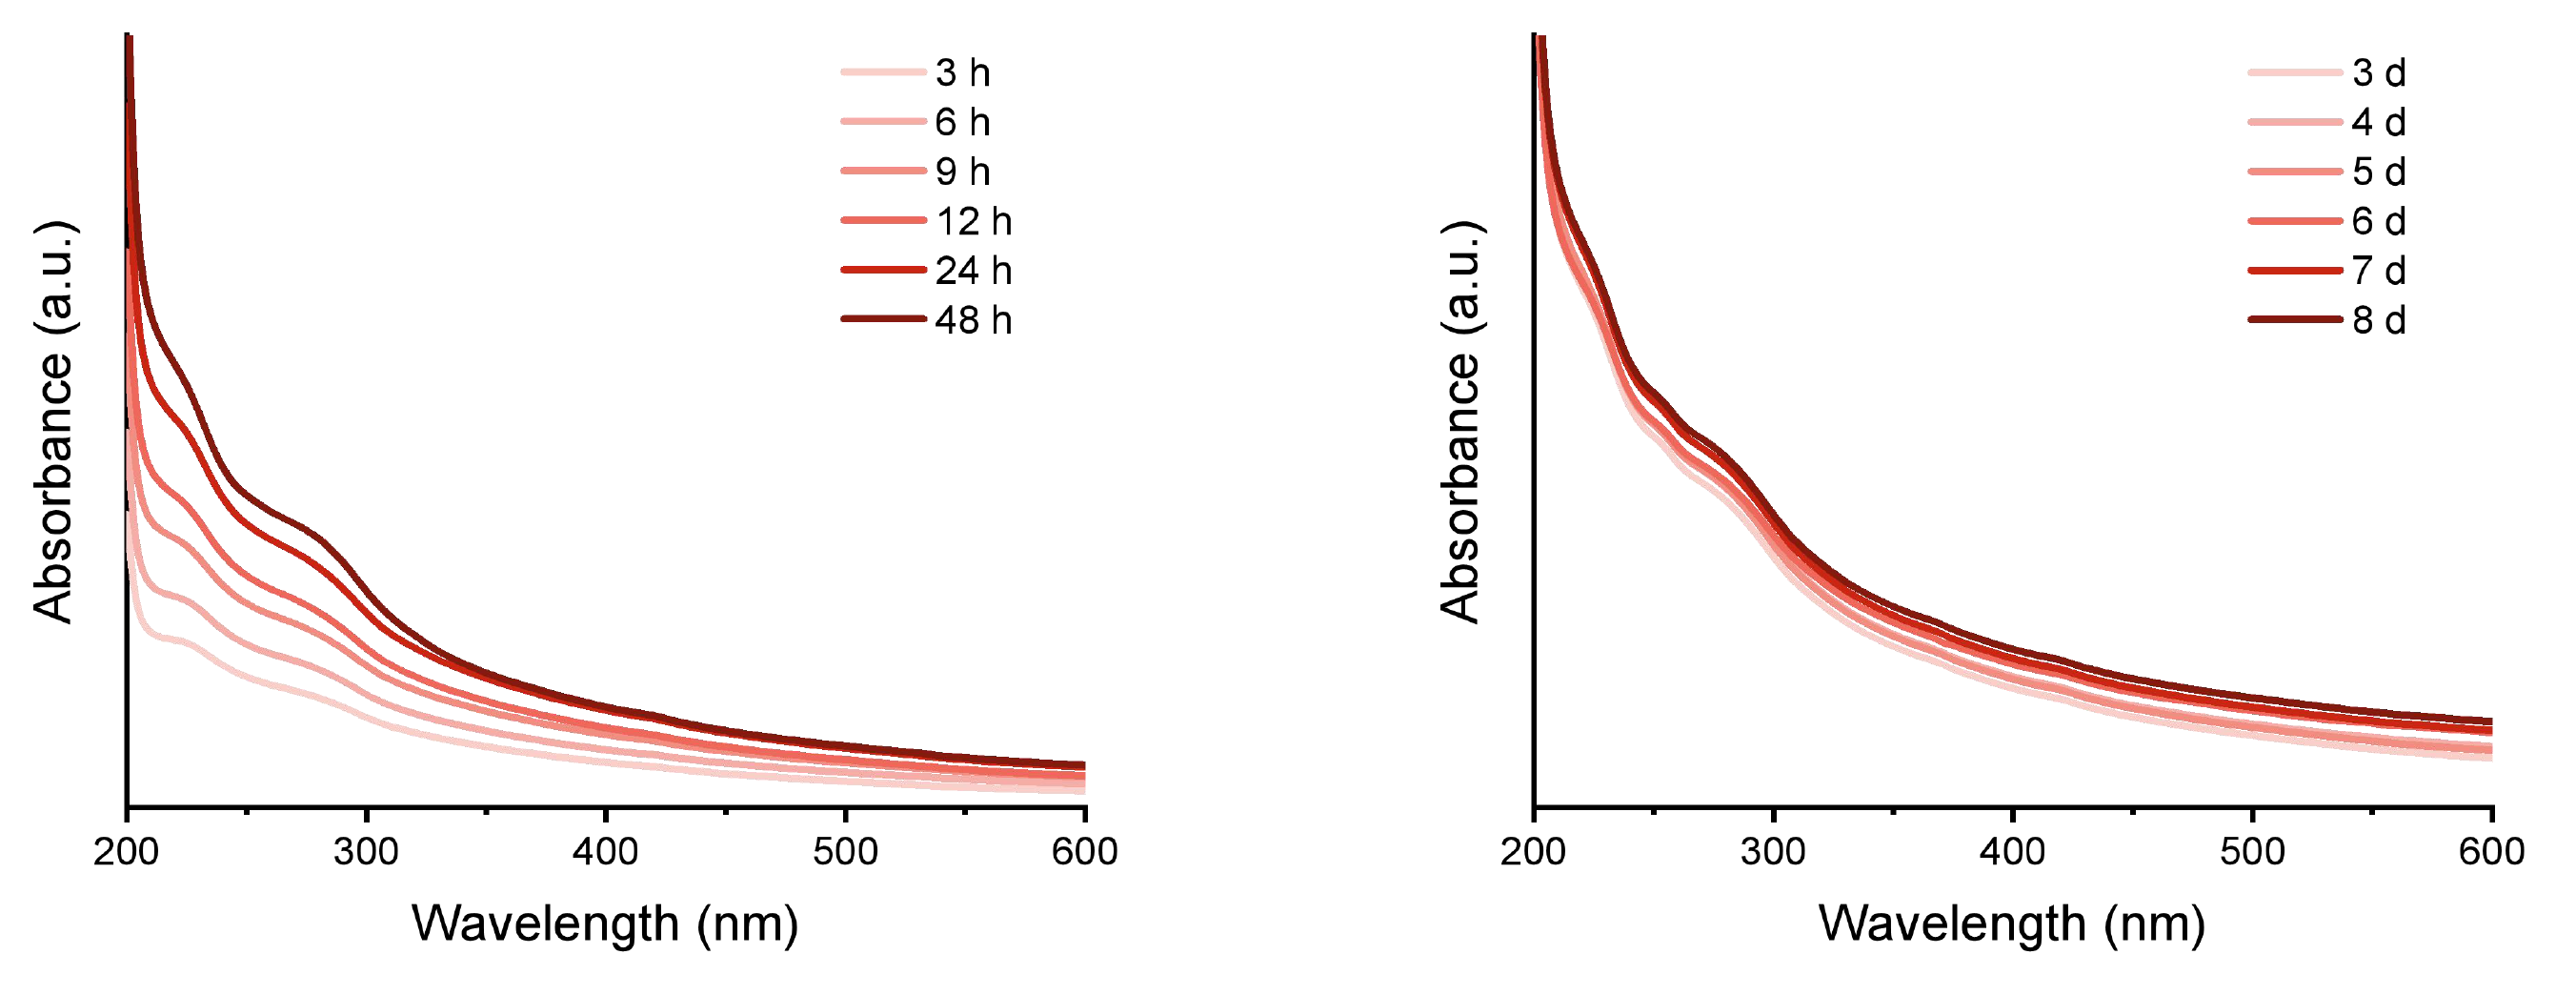


**Fig. S6** UV-Vis absorption spectra of UA released from RCDs/UA@Lipo-HAMA.


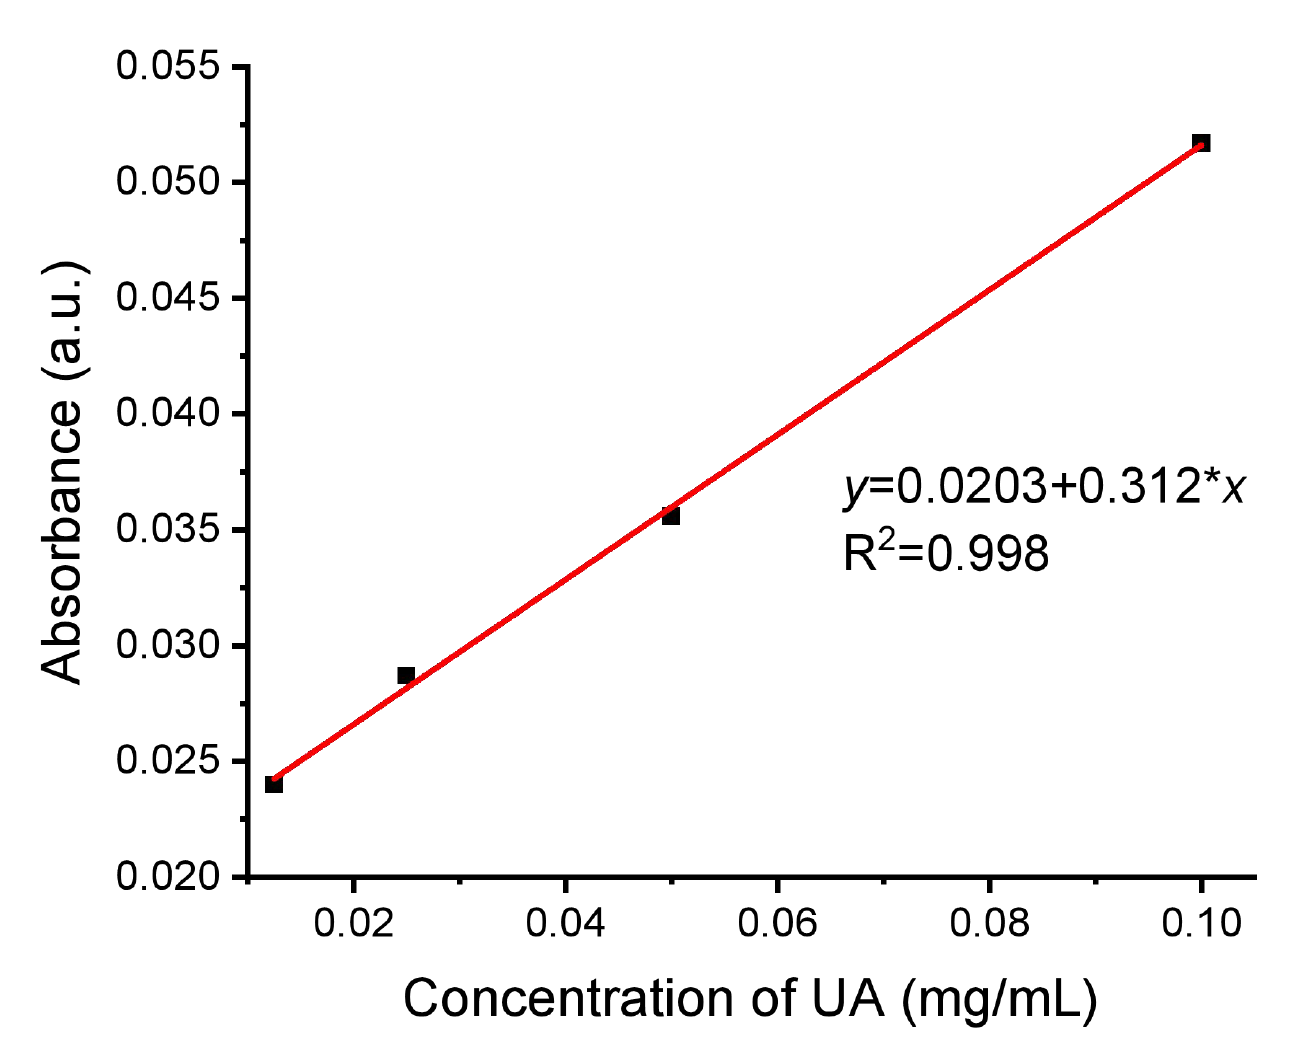


**Fig. S7** Relation curve of mass concentration-absorption intensity of UA.


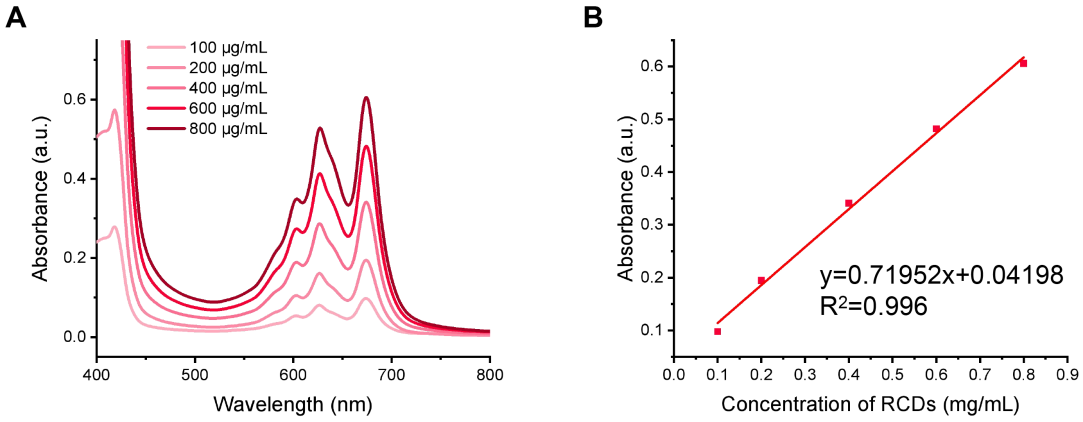


**Fig. S8** (A) UV-Vis absorption spectra of RCDs at different concentrations. (B) Relation curve of mass concentration-absorption intensity of RCDs.


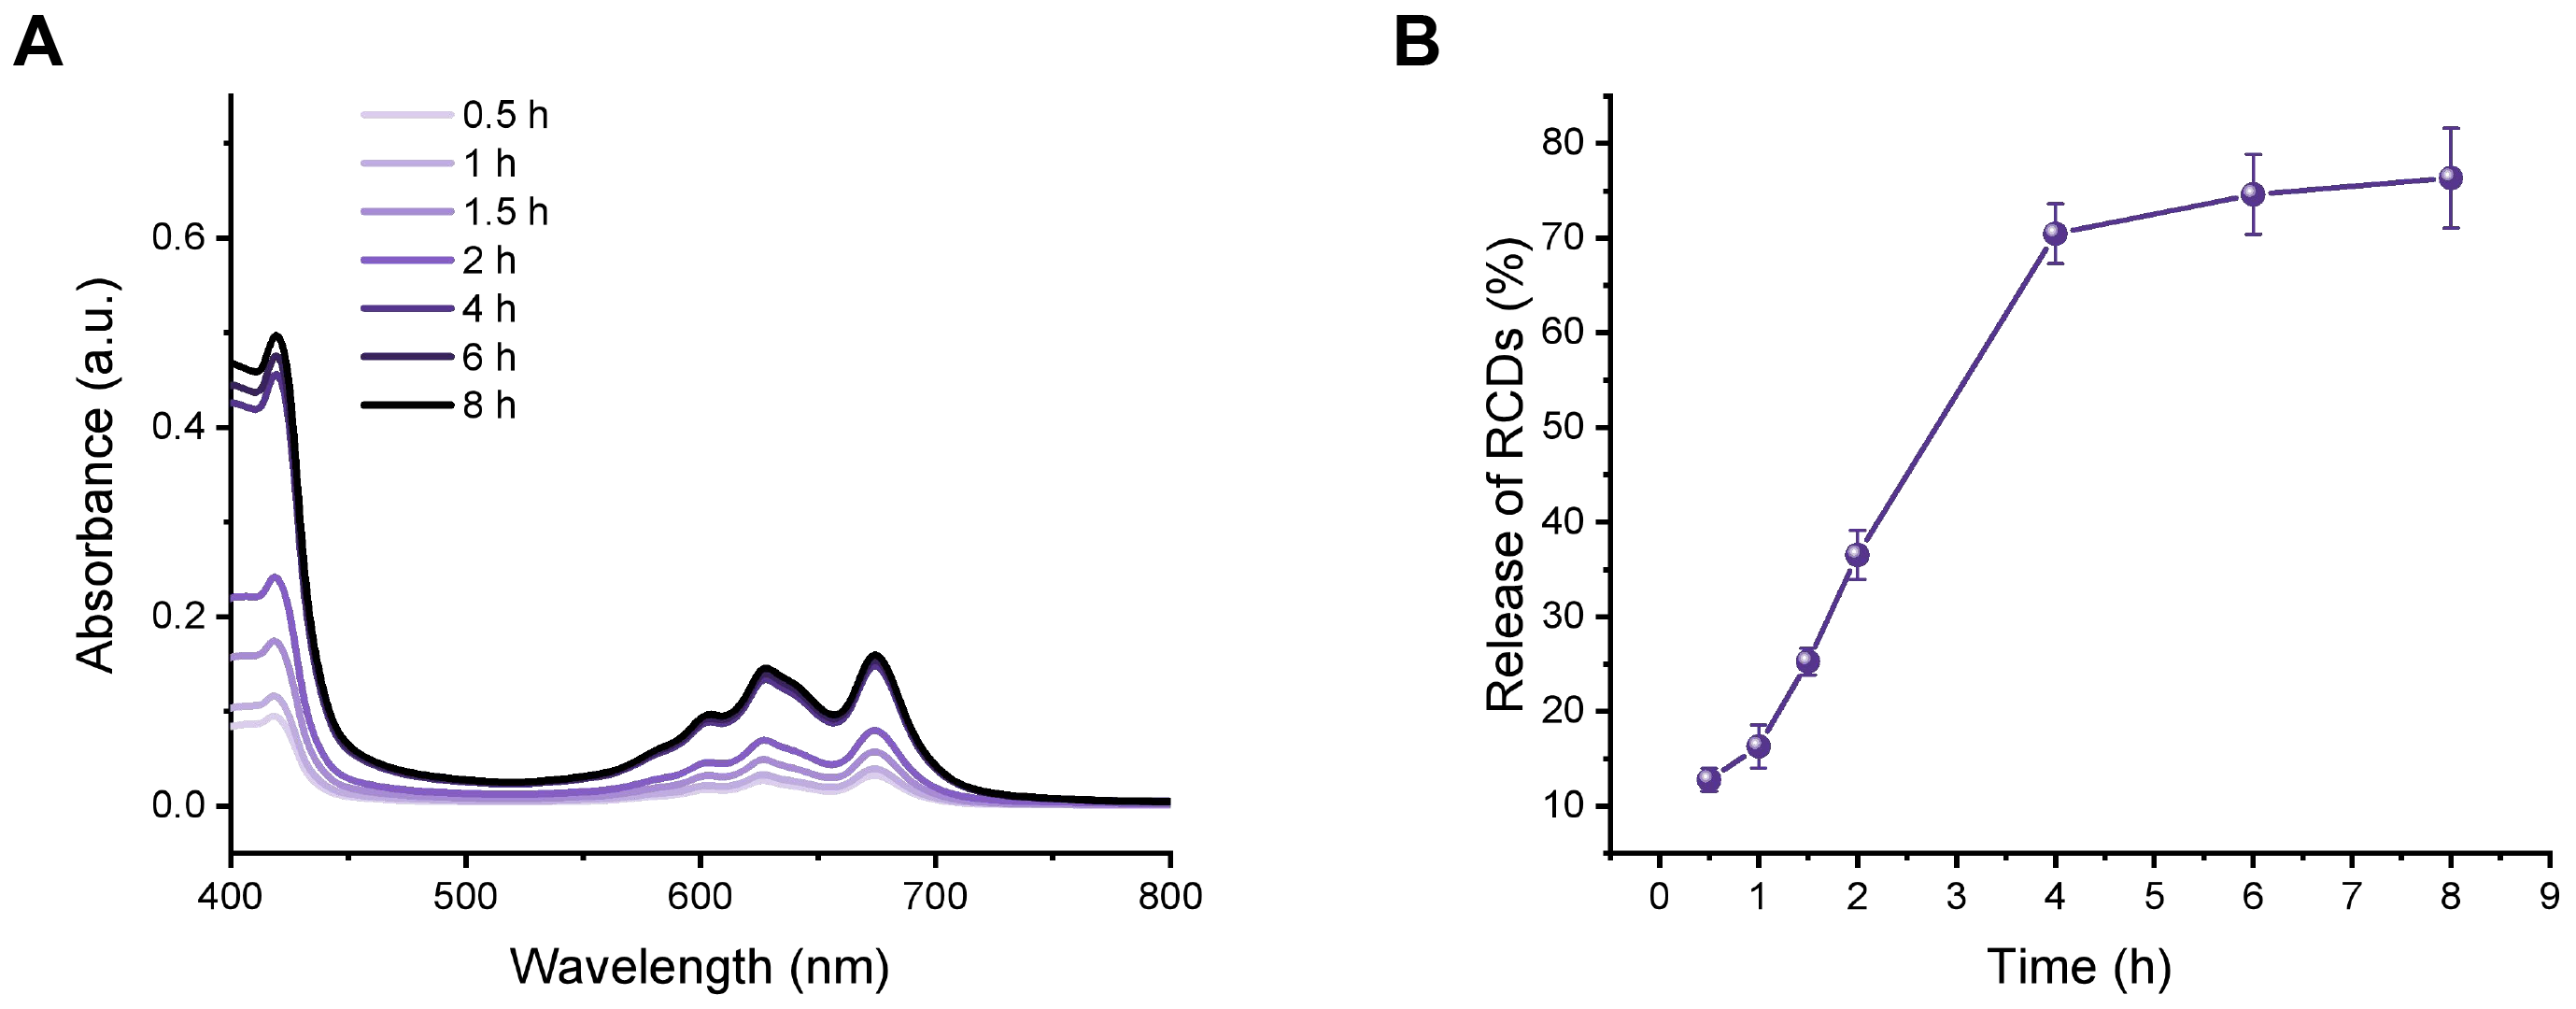


**Fig. S9**. (A) UV-Vis absorption spectra of RCDs releasing from RCDs/UA@Lipo-HAMA at different immersion times. (B) Release curve of RCDs from RCDs/UA@Lipo-HAMA.


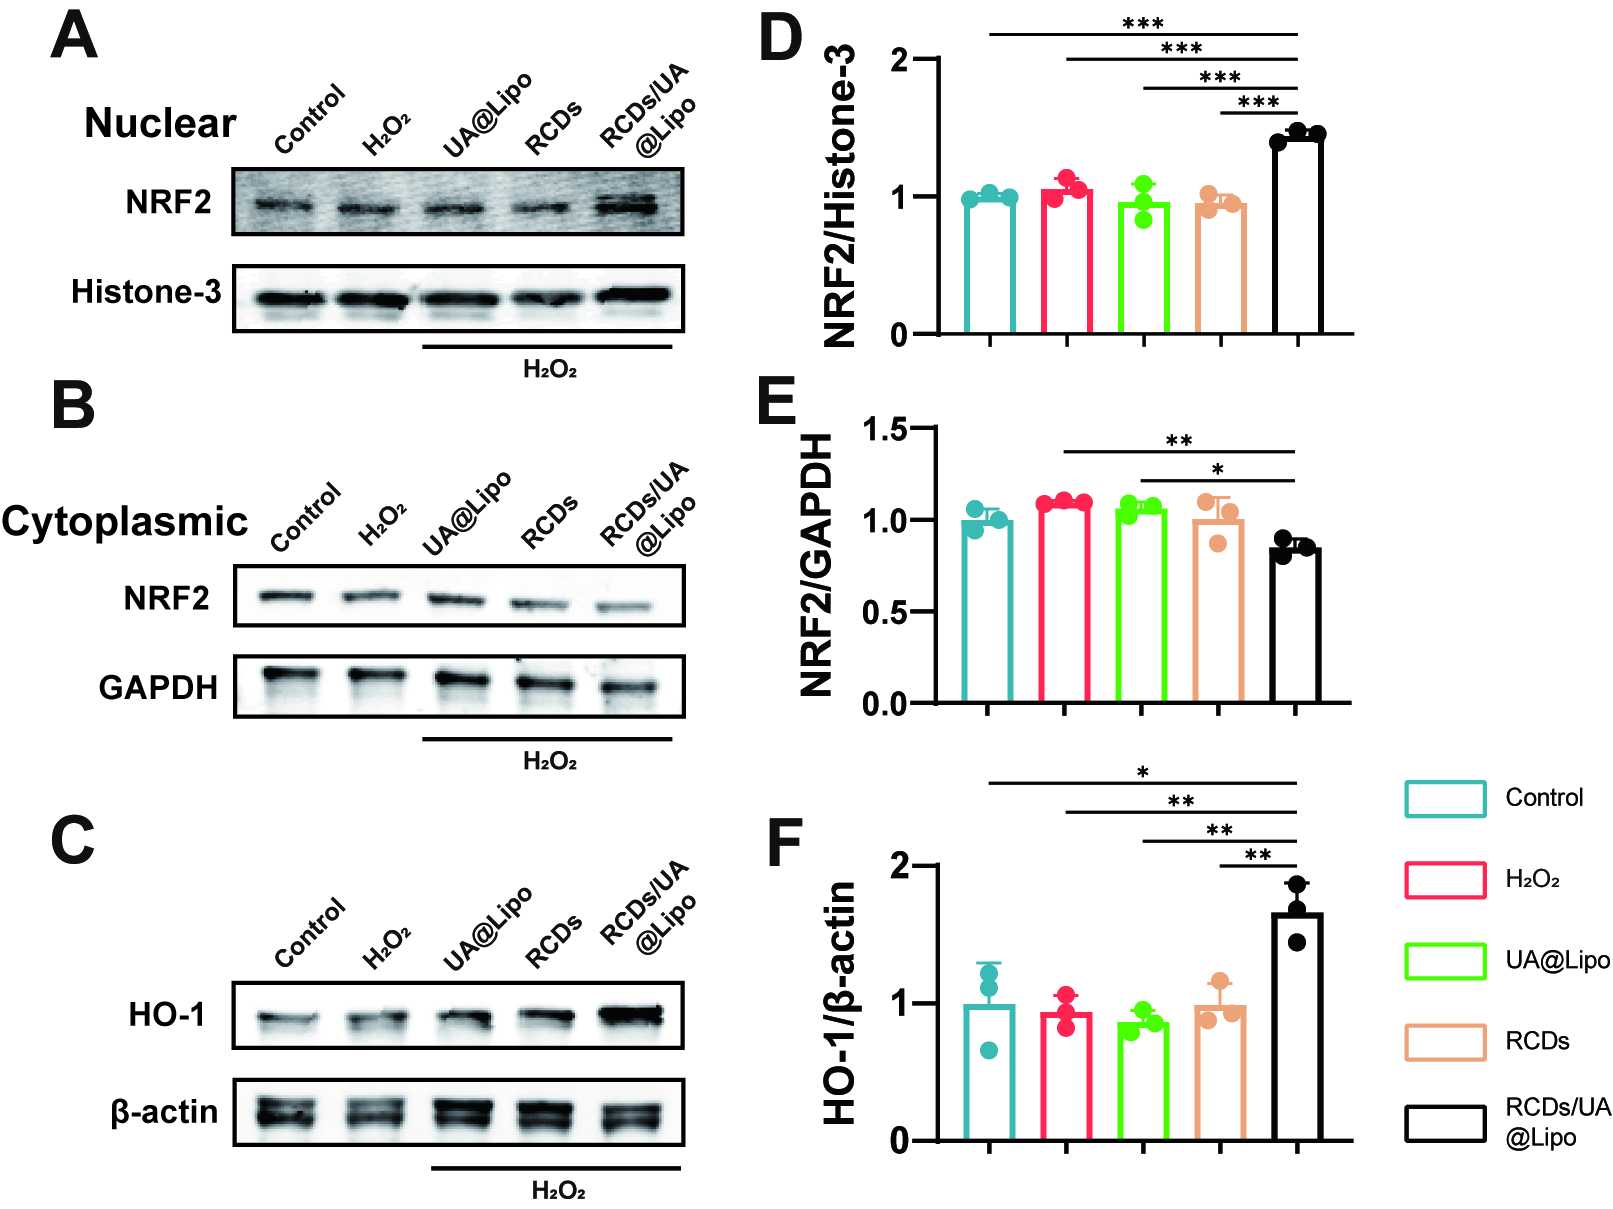


**Fig. S10** Effects of RCDs/UA@Lipo on Nrf2 and HO-1 levels in H2O2 model. (A) Nrf2 protein levels were detected by Western blot. Histone-3 was used as a loading control for nuclear fractions. (B) Cytoplasmic Nrf2 protein levels were detected and GAPDH was used as a loading control for cytoplasmic fractions. (C) HO-1 protein levels were measured. (D–F) Semiquantitative analysis of the relative fluorescent intensity of (A–C) (n = 3). Data are presented as mean ± SD; comparisons between the groups were performed one-way ANOVA. *P < 0.05;**P < 0.01, ***P < 0.001.


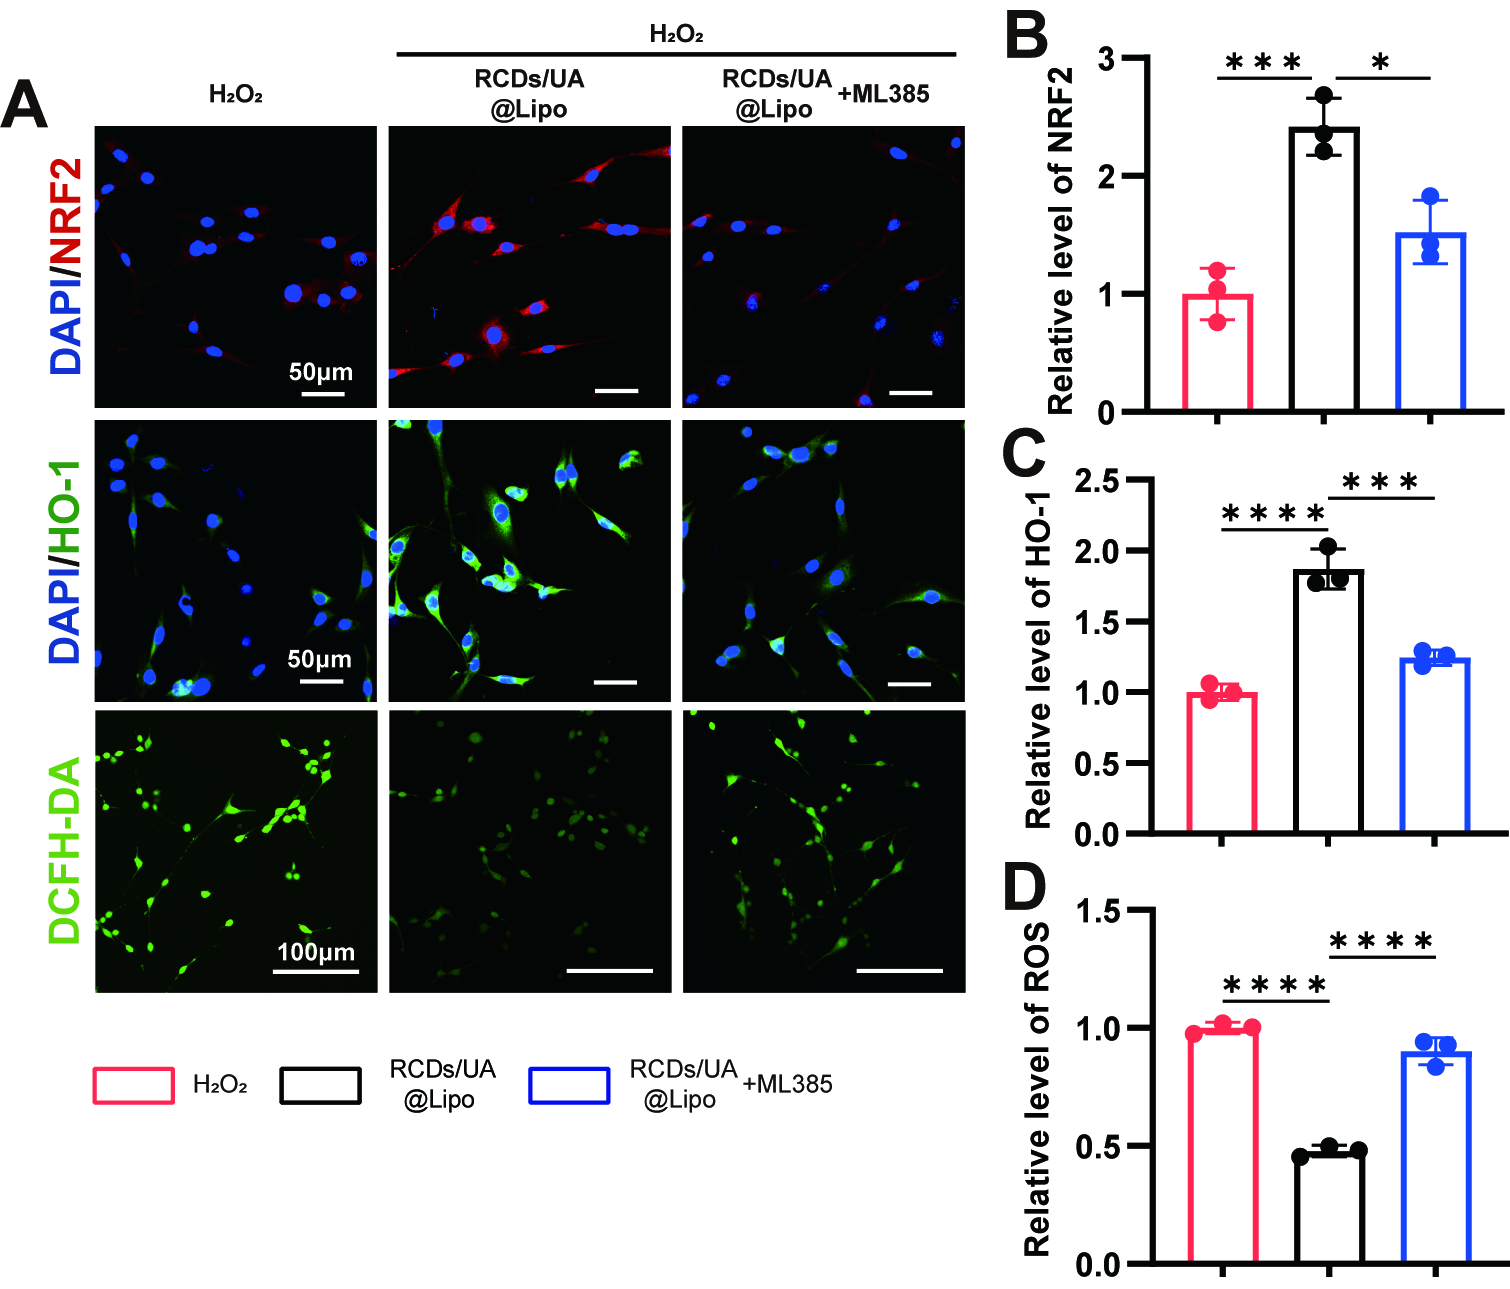


**Fig. S11**  ML385 inhibited the effects of RCDs/UA@Lipo on the expression of Nrf2 and HO-1 levels in H2O2 model. (A) IF staining images of Nrf2, HO-1, and intracellular ROS and superoxide. (B–D) Semiquantitative analysis of the relative fluorescent intensity of (A) (n = 3). Data are presented as mean ± SD; comparisons between the groups were performed one-way ANOVA. *P < 0.05; ***P < 0.001, ****P < 0.0001.
